1 **Engram reactivation during memory retrieval predicts long-term memory performance**  
2 **in aged mice**

3

4

5 Kubra Gulmez Karaca<sup>a,1,2</sup>, David V.C. Brito<sup>a</sup>, Janina Kupke<sup>a</sup>, Benjamin Zeuch<sup>a,3</sup>, Ana M.M.  
6 Oliveira<sup>a,\*</sup>

7

8 <sup>a</sup>Department of Neurobiology, Interdisciplinary Centre for Neurosciences (IZN), Heidelberg  
9 University, INF 366, 69120 Heidelberg, Germany.

10

11 <sup>1</sup> Present address: <sup>1</sup> Department of Cognitive Neuroscience, Radboud university medical  
12 center, 6500 HB Nijmegen, The Netherlands

13

14 <sup>2</sup> Present address: Donders Institute for Brain, Cognition and Behaviour, Radboud University  
15 Nijmegen, 6525 EN Nijmegen, The Netherlands

16

17 <sup>3</sup>Present address: Directors' Research, European Molecular Biology Laboratory (EMBL),  
18 Meyerhofstrasse 1, 69117 Heidelberg, Germany

19

20 \* Corresponding author: Ana M.M. Oliveira

21 Department of Neurobiology, Interdisciplinary Center for Neurosciences (IZN), Heidelberg  
22 University

23 Im Neuenheimer Feld 366

24 69120 Heidelberg, Germany

25 +49 6221 54-16510

26 [oliveira@nbio.uni-heidelberg.de](mailto:oliveira@nbio.uni-heidelberg.de)

27

28

29 **Abstract**

30 Age-related cognitive decline preferentially targets long-lasting episodic memories that  
31 require intact hippocampal function. Memory traces (or engrams) are believed to be encoded  
32 within the neurons activated during learning (neuronal ensembles), and recalled by  
33 reactivation of the same population. However, whether engram reactivation dictates memory  
34 performance late in life is not known. Here, we labelled neuronal ensembles formed during  
35 object location recognition learning in the dentate gyrus, and analyzed the reactivation of this  
36 population by long-term memory recall in young adult, cognitively impaired- and unimpaired-  
37 aged mice. We found that reactivation of memory-encoding neuronal ensembles at long-term  
38 memory recall was disrupted in impaired but not unimpaired-aged mice. Furthermore, we  
39 showed that the memory performance in the aged population correlated with the degree of  
40 engram reactivation at long-term memory recall. Overall, our data implicates recall-induced  
41 engram reactivation as a prediction factor of memory performance in aging. Moreover, our  
42 findings suggest impairments in neuronal ensemble stabilization and/or reactivation as an  
43 underlying mechanism in age-dependent cognitive decline.

44

45 **Keywords:** aging, dentate gyrus, hippocampus, memory trace, neuronal ensembles, object  
46 location memory.

47

48 **1. Introduction**

49 Age-related cognitive decline refers to the gradual decrease in cognitive performance  
50 throughout the aging process, mostly affecting long-term storage of episodic and spatial  
51 memories that depend on hippocampal function (Burke and Barnes, 2006). The dentate  
52 gyrus (DG) is the hippocampal subregion most sensitive to the effects of advanced age  
53 (Small et al., 2011, 2004). The DG undergoes anatomical and physiological changes as well  
54 as alterations in the transcriptomic profile that are thought to underlie the aging-associated  
55 dysfunction (Burke and Barnes, 2010; Janov et al., 2016). It has recently been shown that  
56 subsets of DG neurons activated during learning (i.e., neuronal ensembles) belong to the  
57 memory engram, and that the reactivation of this neuronal population at memory recall is  
58 necessary and sufficient to evoke memory retrieval in young adult mice (Josselyn et al.,  
59 2015; Tonegawa et al., 2015). Moreover, dysfunctions in neuronal ensemble reactivation and  
60 memory retrieval mechanisms have been proposed as an underlying cause of dementia in  
61 pathological conditions, such as Alzheimer's disease (Perusini et al., 2017; Poll et al., 2020;  
62 Roy et al., 2016), in which aging presents a major risk factor. However, whether memory  
63 impairments observed late in life are associated with disruptions in neuronal ensemble  
64 reactivation is not known.

65 Here, we hypothesized that differences in DG neuronal ensemble dynamics underlie the  
66 inter-individual variability in long-term memory (LTM) performance in the aged population.  
67 We used tagging tools to label and characterize the formation and reactivation of neuronal  
68 ensembles associated with long-term spatial recognition memory, a form of memory  
69 particularly susceptible to decline with age. We showed that impairments in long-term spatial  
70 memory during aging are associated with impaired reactivation of memory-encoding  
71 neuronal ensembles at LTM recall. Moreover, we found that the degree of engram  
72 reactivation in aged mice correlated with long-term spatial memory performance. Overall, our  
73 findings identified novel cellular correlates of age-related memory decline.

74

75 **2. Materials and Methods**

76 2.1. *Animals*. 8-10 weeks or 18-20 months old male C57BL/6JRj mice (Janvier Labs,  
77 Germany) were individually housed on a 12 h light/dark cycle and *ad libitum* access to food  
78 and water (after stereotaxic surgery regular food was replaced by doxycycline-containing diet  
79 (40mg/kg, BioServ, Flemington, NJ, USA)). Experiments were carried out during the light  
80 phase. All of the animal procedures were approved and performed according to the  
81 European Community Council Directive 86/609/EEC.

82 2.2. *Recombinant adeno associated viruses (rAAVs)*. rAAVs were produced and purified as  
83 described previously (Gulmez Karaca et al., 2020; Zhang et al., 2007). The RAM-HA-GFP  
84 viral construct was generated by insertion of a HA-tagged GFP expression cassette into the  
85 multiple cloning site (MCS) of rAAV-RAM (rAAV-RAM-d2TTA::TRE-MCS-WPRE-pA) that  
86 was a kind gift from Yingxi Lin (Addgene plasmid # 63931; <http://n2t.net/addgene:63931>;  
87 RRID:Addgene\_63931)) (Gulmez Karaca et al., 2020; Sørensen et al., 2016).

88 2.3. *Stereotaxic surgery*. 250 nl of rAAV-RAM viral solution was injected into the dentate  
89 gyrus (DG) of the hippocampus at the following coordinates relative to Bregma: – 2.0 mm  
90 anteroposterior, ± 1.3 mm medio-lateral, – 2.4 mm dorsoventral at the rate of 80-100 nl / min.  
91 The needle was left in place for 10 min before and after each injection to allow DG-specific  
92 diffusion of the fluid. Only the mice with viral spread throughout the DG of at least 60 µm  
93 range in the AP axis were considered for behavior and further analysis. Throughout the  
94 study, a total of 10 mice were rejected from the analysis due to insufficient viral spread (5  
95 mice) and/or lack of exploration during behavioral training or testing (5 mice).

96 2.4. *Behavior paradigms*. Three weeks after stereotaxic surgery and following 5 days of  
97 handling, the spatial object recognition (SOR) test was performed. SOR training involved four  
98 sessions; each lasted 6 min and was separated by 3 min intervals in the home-cage. In the  
99 first session, mice explored an empty black, square open field (50 cm × 50 cm × 50 cm) with  
100 a visual cue placed on one wall. This session was also used for the open field test as  
101 described previously (Brito et al., 2020b, 2020a; Gulmez Karaca et al., 2018). The Smart  
102 Video Tracking Software (Panlab, Harvard Apparatus) was used to score the time spent in  
103 the central zone (32% of the arena), number of center entries and total distance travelled in

104 the open field test. In the next three sessions of the SOR training, mice freely explored two  
105 diagonally located distinct objects (a glass bottle and a metal tower) in the arena. After the  
106 training, mice were placed in the home-cage and were undisturbed until the memory test.  
107 During the memory test (24 h post-training), one of the two objects was displaced in the  
108 arena (while the other one remained in the original position), which the mice explored freely  
109 for 6 min. Object exploration was defined as the animal sniffing the object or pointing its nose  
110 to the object within 1-cm distance. When the animal leaned on the object but did not direct  
111 the nose towards it, object exploration was not considered. SOR memory performance was  
112 assessed by the formula ( $T_{\text{displaced}} / (T_{\text{nondisplaced}} + T_{\text{displaced}}) \times 100$ ) where T represents time  
113 exploring an object. Assigning the aged mice into cognitively impaired and unimpaired  
114 groups was performed based on the mean SOR memory performance of the young group.  
115 Aged mice displaying memory performance lower than one standard deviation from the  
116 mean of young mice were designated as cognitively impaired.

117 *2.5. Immunohistochemistry.* 2 h after the start of the SOR test, mice were perfused  
118 intracardially with 4% paraformaldehyde (PFA) (Sigma, Munich, Germany) and free-floating  
119 brain slices (at a thickness of 20  $\mu\text{m}$ ) were immunostained as previously described (Gulmez  
120 Karaca et al., 2018; Oliveira et al., 2012). Primary antibodies were used at the following  
121 concentrations: anti-HA tag (Covance MMS-101R (1:1000)), anti-Fos (Cell Signaling #2250,  
122 1:1000)).

123 *2.6. Image acquisition and analysis.* Z-stacks of DG images (3 frames with 2  $\mu\text{m}$  interval at  
124 20x magnification) were acquired with Nikon A1R confocal microscope (at Nikon Imaging  
125 Center, BioQuant, Heidelberg) using NIS-Elements software or with Leica SP8 confocal  
126 microscope using LAS X software. Maximum projection files of each stack were imported in  
127 Fiji (Schindelin et al., 2012), and Fos<sup>+</sup> or HA-GFP<sup>+</sup> neurons were manually marked after  
128 background subtraction and application of a signal threshold. Reactivation rate  
129  $((\text{GFP}^+\text{Fos}^+)/(\text{GFP}^+)\times 100)$ , and similarity index  $((\text{GFP}^+\text{Fos}^+)/((\text{GFP}^+)+(\text{Fos}^+)-$   
130  $(\text{GFP}^+\text{Fos}^+))\times 100$  was calculated as previously described (Cowansage et al., 2014; Gulmez  
131 Karaca et al., 2020; Milczarek et al., 2018). Data was normalized to the mean of the aged

132 impaired group to avoid artifacts that may be caused from different viral expressions among  
133 experimental batches.

134 *2.7. Statistical analysis.* Blinding to experimental conditions was applied to image and  
135 behavioral analysis. Each data was subjected to a normality test (Shapiro-Wilk normality test,  
136  $\alpha=0.05$ ) before further analysis. For normally distributed data ordinary one-way ANOVA  
137 followed by Tukey's multiple comparisons test, whereas for non-normally distributed data,  
138 Kruskal-Wallis test followed by Dunn's multiple comparisons test was used to compare three  
139 groups. When comparing two dependent data sets, paired t-test was performed if the data  
140 set showed a normal distribution, if not, Wilcoxon matched-pairs signed rank test was  
141 applied. For correlation analysis, Pearson correlation test was applied when the data  
142 followed a normal distribution. Nonparametric Spearman correlation was computed in case of  
143 a non-normally distributed dataset. Statistical analysis was performed using GraphPad prism  
144 for Mac OS X, version 8.

145

### 146 **3. Results**

147 *3.1. Neuronal ensemble tagging in the DG of young, cognitively-impaired or -unimpaired*  
148 *aged mice.* We aimed at characterizing DG neuronal ensembles that hold long-term  
149 representations of object location memory in order to identify possible correlates of cognitive  
150 dysfunction in the aged population. To label the neuronal ensemble activated during learning,  
151 we used the robust activity marking (RAM) system (Sørensen et al., 2016) that allowed  
152 learning-dependent expression of HA-tagged GFP (Sørensen et al., 2016) (**Figure 1A**). We  
153 have previously confirmed that this tool reliably tags the DG neuronal ensembles associated  
154 with object location memory (Gulmez Karaca et al., 2020). First, we stereotaxically delivered  
155 recombinant adeno associated viruses (rAAVs) containing the RAM-HA-GFP viral construct  
156 into the DG of young-adult (2 months old) or aged (18-20 months old) mice. Through the  
157 removal of doxycycline diet, we tagged the neuronal population activated during object  
158 location training (**Figure 1A**). When tested 24 h after training all young adult mice displayed  
159 higher than chance (50%) preference for the displaced object (**Figure 1B**), indicating intact

160 long-term object location memory. In contrast, the performance of the aged group was  
161 heterogenous; some mice performed similarly to young mice, whereas others showed  
162 preferences closer to chance level (**Figure 1B**). To be able to characterize the aged  
163 population according to individual differences in cognitive performance, we sorted the aged  
164 group into aged impaired (AI) and aged unimpaired (AU) based on the mice's long-term  
165 spatial memory scores (**Figure 1B**). Aged mice displaying preferences for the displaced  
166 object lower than one standard deviation below the mean of young mice (64.3%, represented  
167 with a dashed line in Figure 1B) were considered impaired. Importantly, we confirmed that all  
168 groups displayed comparable object exploration times during the training session (**Figure**  
169 **1C**) and demonstrated similar locomotion and anxiety-like behavior in open-field test (**Figure**  
170 **1D-F**). This indicates that poor LTM performance in AI mice was not due to lower exploratory  
171 behavior or motor or anxiety impairments.

172 *3.2. Cognitively impaired aged mice exhibit impaired recall-induced neuronal ensemble*  
173 *reactivation in the upper blade of the DG.* Next, we investigated the reactivation of spatial  
174 memory-associated neuronal ensembles in response to LTM recall. To this end, the  
175 expression of HA-GFP and Fos in the DG, that represents active neurons during learning or  
176 LTM recall respectively, was analyzed 2 h after object location test (**Figure 2A**). The  
177 neuronal population coexpressing HA-GFP and Fos represented the population active in both  
178 episodes, i.e., reactivated neuronal ensemble (**Figure 2B**). Given the previously described  
179 differences in responsiveness of the upper and lower blades of the DG to environmental  
180 exposure (Chawla et al., 2013; Gulmez Karaca et al., 2020; Marrone et al., 2012; Ramirez-  
181 Amaya et al., 2013), we analyzed the two subregions separately. We found that AI mice  
182 exhibited reduced recall-driven reactivation of the neuronal population activated by learning  
183 in the DG compared to young or AU mice (**Figure 2C**), whereas the reactivation rates  
184 observed in the DG of young and AU mice were similar (**Figure 2C**). Interestingly, the  
185 impaired reactivation rate was specific for the neuronal ensembles located in the upper, but  
186 not the lower, blade of the DG in AI mice (**Figure 2C**). Although AI mice were able to  
187 reactivate the learning-activated neuronal population at a rate significantly higher than what

188 would occur by chance, the observed overlap above chance level was higher both in the  
189 young and AU groups compared to the AI group (**Figure 2D**). The analysis of the two DG  
190 blades independently, showed that, similarly to what we observed for the reactivation rate  
191 (**Figure 2C**), the effect originated from the upper blade (**Figure 2D**). There was no significant  
192 difference in the reactivation above chance levels of young and AU mice (**Figure 2D**).  
193 Furthermore, to evaluate whether the learning-activated neuronal ensemble pattern was  
194 reinstated equally in all of the three groups at memory recall, we applied a second formula,  
195 the similarity index (Milczarek et al., 2018). This formula complements reactivation rate by  
196 also including the number of the neurons activated solely by recall, and thereby allows to  
197 measure the degree of similarity in the neuronal activity pattern at learning and recall. We  
198 observed that AI mice exhibited the same selective impairment in the DG upper blade  
199 (**Figure 2E**). We then confirmed that the identified differences between the AI and AU were  
200 not due to differences in the number of neurons activated by learning (GFP<sup>+</sup>) (**Figure 2F**) or  
201 by recall (Fos<sup>+</sup>) (**Figure 2G**) in the aged population. Although learning triggered the activation  
202 of fewer neurons in the AU mice than the young (**Figure 2F**), this did not correlate with  
203 reactivation rate in the DG upper blade ( $p=0.2286$ ,  $r=-0.3073$ , Spearman correlation, data not  
204 shown) or with memory performance ( $p=0.1566$ ,  $r=-0.3594$ , Pearson correlation, data not  
205 shown) in the aged. Altogether, this set of experiments revealed that despite being able to  
206 activate a similar proportion of neurons upon learning or memory recall, cognitively impaired  
207 mice exhibit disrupted neuronal ensemble reactivation at LTM recall in the upper blade of the  
208 DG.

209 *3.3. LTM performance of aged mice correlates with the reactivation rate in the upper blade of*  
210 *the DG.* Finally, we tested whether the neuronal ensemble reactivation rate in the upper DG  
211 blade correlates with memory performance in aged mice. For this, we performed Pearson  
212 correlation analysis between LTM performance and reactivation rate in the aged population  
213 (i.e., pooled data of AI and AU mice). Remarkably, we found a significant positive correlation  
214 between the rate of neuronal ensemble reactivation in the total DG and the memory score of  
215 the mice ( $p=0.0272$ ,  $r=0.5396$ , Spearman correlation, data not shown) which primarily



216 originated from the upper blade of the DG (**Figure 2H**), but was not present in the lower  
217 blade of the DG ( $p=0.3668$ ,  $r=0.2496$ , Spearman correlation, data not shown). Similar to the  
218 reactivation rate, we observed a correlation between the degree of the similarity index in the  
219 total DG and long-term memory performance in aged mice ( $p=0.0064$ ,  $r=0.6437$ , Spearman  
220 correlation, data not shown) that was selectively present in the upper blade of the DG  
221 (**Figure 2I**), but not in the lower blade of the DG ( $p=0.6874$ ,  $r=0.1128$ , Spearman correlation,  
222 data not shown). Overall, these results demonstrated that cognitive performance during  
223 aging positively correlates with neuronal ensemble reactivation during the recall of LTM.

224

#### 225 **4. Discussion**

226 In this study, we tagged the neuronal ensemble formed during a spatial recognition task in  
227 the DG of young, aged-impaired and aged-unimpaired mice and identified a cellular correlate  
228 of cognitive performance in aged mice. We showed that cognitively impaired aged mice  
229 exhibit impairments in recruiting the original memory engram at long-term spatial memory  
230 recall compared to young or cognitively unimpaired aged mice. We further showed that the  
231 degree of engram reactivation correlates with the strength of LTM in the aged population.  
232 We focused on long-term object location memory which has previously been shown to be  
233 impaired by aging (Oliveira et al., 2012; Wimmer et al., 2012). Increasing evidence suggests  
234 that each memory is encoded by a subset of neurons (neuronal ensembles) that are  
235 synchronously activated upon learning and reactivated by the retrieval of the memory  
236 (Josselyn et al., 2015; Tonegawa et al., 2015). A previous study by Penner and colleagues  
237 showed that neuronal reactivation upon short-term re-exposure to a previously visited  
238 context is reduced in the DG, but not CA1, of aged compared to young adult mice (Penner et  
239 al., 2011). These findings suggest that impairments in neuronal reactivation may be  
240 associated with cognitive deficits in aged individuals (Penner et al., 2011). Here, we  
241 characterized DG neuronal ensemble during the formation and retrieval of long-term  
242 recognition memory and correlated with the performance in the same task. We found that  
243 aging-related impairments in long-term object location memory are not associated with the

244 size of the DG neuronal population activated by learning or recall, but rather with the fidelity  
245 of reactivation of the encoding population during memory retrieval. Aged impaired and  
246 unimpaired mice showed similar number of neurons activated by learning or by recall. In  
247 contrast, cognitively impaired mice had significantly disrupted reactivation rates compared to  
248 unimpaired aged, or young adult mice. Intriguingly, the differences were found in the  
249 neuronal population located in the upper, but not lower, blade of the DG. This is in line with  
250 previous studies showing that behaviorally-induced expression of activity regulated genes  
251 occurs primarily in the upper blade of the DG (Chawla et al., 2013, 2005; Erwin et al., 2020;  
252 Gulmez Karaca et al., 2020; Marrone et al., 2012; Ramirez-Amaya et al., 2013). These  
253 reports indicate that the sparse population of DG upper blade neurons form the spatial  
254 memory neuronal ensemble. Therefore, it may be expected that alterations in ensemble  
255 dynamics are specific to this subregion. Finally, our findings showed a positive correlation  
256 between the neuronal ensemble reactivation rate in the upper blade of the DG and LTM  
257 performance of aged mice. These findings suggest a novel mechanism that may underlie  
258 long-term spatial memory integrity in the aged population.

259 The underlying molecular and physiological causes of disrupted neuronal ensemble  
260 reactivation in aged cognitively-impaired aged mice are not understood. It is well established  
261 that aging is accompanied by anatomical and physiological changes in the DG. Namely,  
262 fewer synaptic contacts and impaired synaptic plasticity in aged versus young adults have  
263 been reported (Burke and Barnes, 2010). Interestingly, age-related impairments in LTP  
264 maintenance correlated with memory performance (Rosenzweig and Barnes, 2003). Thus,  
265 deficits in the reactivation of the original encoding neuronal population may result from  
266 impaired neuronal ensemble stabilization during memory consolidation, which could emerge  
267 from the inability to strengthen the connectivity between ensemble neurons.

268 Recently, a few studies showed that LTM impairments in a mouse model of Alzheimer's  
269 disease (AD) are linked to deficits in neuronal ensemble reactivation (Perusini et al., 2017;  
270 Poll et al., 2020; Roy et al., 2016). Our findings now show that alterations in neuronal  
271 ensemble properties are a common mechanism in aging and aging-associated pathological

272 conditions. This underscores the need for therapeutic approaches targeted at facilitating  
273 engram reactivation to restore age-associated memory impairments.

274

## 275 **Acknowledgements**

276 We thank Stephanie Zeuch for critical comments on the manuscript. This work was  
277 supported by the Deutsche Forschungsgemeinschaft (DFG) [grant numbers SFB 1134  
278 (C01), OL 437/1 and OL 437/2 to A.M.M.O.] and the Chica and Heinz Schaller foundation  
279 [fellowship and research award to A.M.M.O.]. D.V.C.B. is supported by a  
280 Landesgraduiertenförderung (LGF) completion grant (Heidelberg Graduate Academy).

281

## 282 **Disclosure statement**

283 The authors declare no competing financial interests.

284

## 285 **References**

- 286 Brito, D.V.C., Gulmez Karaca, K., Kupke, J., Mudlaff, F., Zeuch, B., Gomes, R., Lopes, L. V., Oliveira,  
287 A.M.M., 2020a. Modeling human age-associated increase in Gadd45y expression leads to  
288 spatial recognition memory impairments in young adult mice. *Neurobiol. Aging*.  
289 <https://doi.org/10.1016/j.neurobiolaging.2020.06.021>
- 290 Brito, D.V.C., Kupke, J., Karaca, K.G., Zeuch, B., Oliveira, A.M.M., 2020b. Mimicking age-associated  
291 Gadd45y dysregulation results in memory impairments in young adult mice. *J. Neurosci.* 40,  
292 1197–1210. <https://doi.org/10.1523/JNEUROSCI.1621-19.2019>
- 293 Burke, S.N., Barnes, C.A., 2010. Senescent synapses and hippocampal circuit dynamics. *Trends*  
294 *Neurosci.* <https://doi.org/10.1016/j.tins.2009.12.003>
- 295 Burke, S.N., Barnes, C.A., 2006. Neural plasticity in the ageing brain. *Nat. Rev. Neurosci.*  
296 <https://doi.org/10.1038/nrn1809>
- 297 Chawla, M.K., Guzowski, J.F., Ramirez-Amaya, V., Lipa, P., Hoffman, K.L., Marriott, L.K., Worley, P.F.,  
298 McNaughton, B.L., Barnes, C.A., 2005. Sparse, environmentally selective expression of Arc RNA

299 in the upper blade of the rodent fascia dentata by brief spatial experience. *Hippocampus* 15,  
300 579–586. <https://doi.org/10.1002/hipo.20091>

301 Chawla, M.K., Penner, M.R., Olson, K.M., Sutherland, V.L., Mittelman-Smith, M.A., Barnes, C.A., 2013.  
302 Spatial behavior and seizure-induced changes in c-fos mRNA expression in young and old rats.  
303 *Neurobiol. Aging* 34, 1184–1198. <https://doi.org/10.1016/j.neurobiolaging.2012.10.017>

304 Cowansage, K.K., Shuman, T., Dillingham, B.C., Chang, A., Golshani, P., Mayford, M., 2014. Direct  
305 Reactivation of a Coherent Neocortical Memory of Context. *Neuron*.  
306 <https://doi.org/10.1016/j.neuron.2014.09.022>

307 Erwin, S.R., Sun, W., Copeland, M., Lindo, S., Spruston, N., Cembrowski, M.S., 2020. A Sparse,  
308 Spatially Biased Subtype of Mature Granule Cell Dominates Recruitment in Hippocampal-  
309 Associated Behaviors. *Cell Rep.* 31. <https://doi.org/10.1016/j.celrep.2020.107551>

310 Gulmez Karaca, K., Brito, D.V.C., Zeuch, B., Oliveira, A.M.M., 2018. Adult hippocampal MeCP2  
311 preserves the genomic responsiveness to learning required for long-term memory formation.  
312 *Neurobiol. Learn. Mem.* 149, 84–97. <https://doi.org/10.1016/j.nlm.2018.02.010>

313 Gulmez Karaca, K., Kupke, J., Brito, D.V.C., Zeuch, B., Thome, C., Weichenhan, D., Lutsik, P., Plass, C.,  
314 Oliveira, A.M.M., 2020. Neuronal ensemble-specific DNA methylation strengthens engram  
315 stability. *Nat. Commun.* 11. <https://doi.org/10.1038/s41467-020-14498-4>

316 Ianov, L., Rani, A., Beas, B.S., Kumar, A., Foster, T.C., 2016. Transcription profile of aging and  
317 cognition-related genes in the medial prefrontal cortex. *Front. Aging Neurosci.* 8.  
318 <https://doi.org/10.3389/fnagi.2016.00113>

319 Josselyn, S.A., Köhler, S., Frankland, P.W., 2015. Finding the engram. *Nat. Rev. Neurosci.*  
320 <https://doi.org/10.1038/nrn4000>

321 Marrone, D.F., Satvat, E., Shaner, M.J., Worley, P.F., Barnes, C.A., 2012. Attenuated long-term Arc  
322 expression in the aged fascia dentata. *Neurobiol. Aging* 33, 979–990.  
323 <https://doi.org/10.1016/j.neurobiolaging.2010.07.022>

324 Milczarek, M.M., Vann, S.D., Sengpiel, F., 2018. Spatial Memory Engram in the Mouse Retrosplenial  
325 Cortex. *Curr. Biol.* <https://doi.org/10.1016/j.cub.2018.05.002>

- 326 Oliveira, A.M.M., Hemstedt, T.J., Bading, H., 2012. Rescue of aging-associated decline in Dnmt3a2  
327 expression restores cognitive abilities. *Nat. Neurosci.* 15, 1111–1113.  
328 <https://doi.org/10.1038/nn.3151>
- 329 Penner, M.R., Roth, T.L., Chawla, M.K., Hoang, L.T., Roth, E.D., Lubin, F.D., Sweatt, J.D., Worley, P.F.,  
330 Barnes, C.A., 2011. Age-related changes in Arc transcription and DNA methylation within the  
331 hippocampus. *Neurobiol. Aging.* <https://doi.org/10.1016/j.neurobiolaging.2010.01.009>
- 332 Perusini, J.N., Cajigas, S.A., Cohensedgh, O., Lim, S.C., Pavlova, I.P., Donaldson, Z.R., Denny, C.A.,  
333 2017. Optogenetic stimulation of dentate gyrus engrams restores memory in Alzheimer’s  
334 disease mice. *Hippocampus.* <https://doi.org/10.1002/hipo.22756>
- 335 Poll, S., Mittag, M., Musacchio, F., Justus, L.C., Giovannetti, E.A., Steffen, J., Wagner, J., Zohren, L.,  
336 Schoch, S., Schmidt, B., Jackson, W.S., Ehninger, D., Fuhrmann, M., 2020. Memory trace  
337 interference impairs recall in a mouse model of Alzheimer’s disease. *Nat. Neurosci.*  
338 <https://doi.org/10.1038/s41593-020-0652-4>
- 339 Ramirez-Amaya, V., Angulo-Perkins, A., Chawla, M.K., Barnes, C.A., Rosi, S., 2013. Sustained  
340 transcription of the immediate early gene arc in the dentate gyrus after spatial exploration. *J.*  
341 *Neurosci.* 33, 1631–1639. <https://doi.org/10.1523/JNEUROSCI.2916-12.2013>
- 342 Rosenzweig, E.S., Barnes, C.A., 2003. Impact of aging on hippocampal function: Plasticity, network  
343 dynamics, and cognition. *Prog. Neurobiol.* [https://doi.org/10.1016/S0301-0082\(02\)00126-0](https://doi.org/10.1016/S0301-0082(02)00126-0)
- 344 Roy, D.S., Arons, A., Mitchell, T.I., Pignatelli, M., Ryan, T.J., Tonegawa, S., 2016. Memory retrieval by  
345 activating engram cells in mouse models of early Alzheimer’s disease. *Nature.*  
346 <https://doi.org/10.1038/nature17172>
- 347 Schindelin, J., Arganda-Carreras, I., Frise, E., Kaynig, V., Longair, M., Pietzsch, T., Preibisch, S., Rueden,  
348 C., Saalfeld, S., Schmid, B., Tinevez, J.Y., White, D.J., Hartenstein, V., Eliceiri, K., Tomancak, P.,  
349 Cardona, A., 2012. Fiji: An open-source platform for biological-image analysis. *Nat. Methods.*  
350 <https://doi.org/10.1038/nmeth.2019>
- 351 Small, S.A., Chawla, M.K., Buonocore, M., Rapp, P.R., Barnes, C.A., 2004. Imaging correlates of brain  
352 function in monkeys and rats isolates a hippocampal subregion differentially vulnerable to

- 353 aging. Proc. Natl. Acad. Sci. U. S. A. <https://doi.org/10.1073/pnas.0400285101>
- 354 Small, S.A., Schobel, S.A., Buxton, R.B., Witter, M.P., Barnes, C.A., 2011. A pathophysiological  
355 framework of hippocampal dysfunction in ageing and disease. Nat. Rev. Neurosci.  
356 <https://doi.org/10.1038/nrn3085>
- 357 Sørensen, A.T., Cooper, Y.A., Baratta, M. V., Weng, F.J., Zhang, Y., Ramamoorthi, K., Fropp, R.,  
358 Laverriere, E., Xue, J., Young, A., Schneider, C., Gøtzsche, C.R., Hemberg, M., Yin, J.C.P., Maier,  
359 S.F., Lin, Y., 2016. A robust activity marking system for exploring active neuronal ensembles.  
360 Elife 5. <https://doi.org/10.7554/eLife.13918>
- 361 Tonegawa, S., Pignatelli, M., Roy, D.S., Ryan, T.J., 2015. Memory engram storage and retrieval. Curr.  
362 Opin. Neurobiol. <https://doi.org/10.1016/j.conb.2015.07.009>
- 363 Wimmer, M.E., Hernandez, P.J., Blackwell, J., Abel, T., 2012. Aging impairs hippocampus-dependent  
364 long-term memory for object location in mice. Neurobiol. Aging.  
365 <https://doi.org/10.1016/j.neurobiolaging.2011.07.007>
- 366 Zhang, S.J., Steijaert, M.N., Lau, D., Schütz, G., Delucinge-Vivier, C., Descombes, P., Bading, H., 2007.  
367 Decoding NMDA Receptor Signaling: Identification of Genomic Programs Specifying Neuronal  
368 Survival and Death. Neuron. <https://doi.org/10.1016/j.neuron.2007.01.025>

369

## 370 **Figure legends**

371

372 **Figure 1.** Tagging neuronal ensembles formed during spatial object-location learning in the DG of  
373 young, cognitively-impaired or -unimpaired aged mice. A) Schematic representation of the RAM-based  
374 viral construct used for neuronal ensemble tagging and of the experimental design. B) Percentage of  
375 preference for displaced object during the object location test session. Dashed line (64.3%) represents  
376 the threshold applied to categorize AI (n=9) and AU (n=8) mice (Y: mean=76.07, SD=11.80, n=16). C)  
377 Total object exploration time during the training session of object-location test ( $p=0.9237$ , Kruskal-  
378 Wallis test with Dunn's multiple comparisons: Y (n=13) vs AU (n=8):  $p>0.9999$ ; Y vs AI (n=9):  
379  $p>0.9999$ ; AU vs AI:  $p>0.9999$ ). D) Representative trajectories during open-field test. E) Total  
380 distance travelled in open-field test ( $F(2, 27)=0.0072$ ,  $p=0.9303$ , One-way ANOVA with Tukey's

381 multiple comparisons test: Y (n=13) vs AU (n=8):  $p=0.9694$ ; Y vs AI (n=9):  $p=0.9287$ ; AU vs AI:  
382  $p=0.9936$ ). F) Percentage of time in the center ( $p=0.8604$ , Kruskal-Wallis test with Dunn's multiple  
383 comparisons: Y (n=13) vs AU (n=8):  $p>0.9999$ ; Y vs AI (n=9):  $p>0.9999$ ; AU vs AI:  $p>0.9999$ ) and  
384 number of center entries ( $F(2,27)=0.05143$ ,  $p=0.9500$ , one-way ANOVA with Tukey's multiple  
385 comparisons: Y (n=13) vs AU (n=8):  $p=0.9826$ ; Y vs AI (n=9):  $p=0.9468$ ; AU vs AI:  $p=0.9926$ ) in open-  
386 field test. ns: not significant. ITR: inverted terminal repeat, DG: Dentate gyrus of the hippocampus,  
387 Dox: doxycycline, AU: aged-unimpaired, AI: aged-impaired, Y: young, rAAV: recombinant adeno-  
388 associated viruses, TRE: tetracycline responsive element, pRAM: robust activity marking promoter.  
389 Error bars represent s.e.m.

390

391 **Figure 2.** Age-related cognitive decline is associated with disrupted DG neuronal ensemble  
392 reactivation at LTM recall. A) Schematic representation of the experimental design. B) Representative  
393 images showing the immunohistochemical analysis of HA-GFP and Fos expression in young, AU and  
394 AI groups. Scale bars represent 50  $\mu\text{m}$ . Dashed lines define DG granule cell layer. White arrows  
395 indicate cells with overlapping HA-GFP and Fos signal, whereas cyan and magenta arrows indicate  
396 individual HA-GFP and Fos signals, respectively. C) Normalized reactivation rates of learning-  
397 activated neuronal ensembles at memory recall (Total DG:  $p=0.0690$ , Kruskal-Wallis test with Dunn's  
398 multiple comparisons: Y vs AU:  $p>0.9999$ ; Y vs AI:  $p=0.1484$ ; AU vs AI:  $p=0.1146$ ; Upper blade:  
399  $p=0.0003$ , Kruskal-Wallis test with Dunn's multiple comparisons: Y vs AU:  $p>0.9999$ ; Y vs AI:  
400  $p=0.0009$ ; AU vs AI:  $p=0.0016$ ; Lower blade:  $p=0.8702$ , Kruskal-Wallis test with Dunn's multiple  
401 comparisons: Y vs AU:  $p>0.9999$ ; Y vs AI:  $p>0.9999$ ; AU vs AI:  $p>0.9999$ ). D) Observed- over chance-  
402 overlap between HA-GFP and Fos expressions in young, AU and AI groups (Observed- vs chance-  
403 overlap: Total Y:  $W = 91$ ,  $p = 0.0002$  by Wilcoxon test; Total AU:  $W = 36$ ,  $p = 0.0078$  by Wilcoxon test;  
404 Total AI:  $W = 43$ ,  $p = 0.0078$  by Wilcoxon test; Upper blade Y:  $W = 91$ ,  $p = 0.0002$  by Wilcoxon test;  
405 Upper blade AU:  $W = 36$ ,  $p = 0.0078$  by Wilcoxon test; Upper blade AI:  $W = 43$ ,  $p = 0.0078$  by  
406 Wilcoxon test; Lower blade Y:  $W = 89$ ,  $p = 0.0005$  by Wilcoxon test; Lower blade AU:  $W = 34$ ,  $p =$   
407  $0.0156$  by Wilcoxon test; Lower blade AI:  $W = 33$ ,  $p = 0.0547$  by Wilcoxon test) (Observed/chance:  
408 Total DG:  $F(2,27)=7.201$ ,  $p=0.0031$ , one-way ANOVA with Tukey's multiple comparisons: Y vs AU:  
409  $p=0.6181$ ; Y vs AI:  $p=0.0152$ ; AU vs AI:  $p=0.0039$ ; Upper blade:  $p=0.0010$ , Kruskal-Wallis test with  
410 Dunn's multiple comparisons: Y vs AU:  $p>0.9999$ ; Y vs AI:  $p=0.0062$ ; AU vs AI:  $p=0.0022$ ; Lower  
411 blade:  $F(2,27)=1.336$ ,  $p=0.2797$ , one-way ANOVA with Tukey's multiple comparisons: Y vs AU:

412  $p=0.5108$ ; Y vs AI:  $p=0.7924$ ; AU vs AI:  $p=0.2557$ ). E) Normalized similarity indices of neuronal  
413 ensemble populations activated at learning or at LTM recall (Total DG:  $p=0.0299$ , Kruskal-Wallis test  
414 with Dunn's multiple comparisons: Y vs AU:  $p>0.9999$ ; Y vs AI:  $p=0.0493$ ; AU vs AI:  $p=0.0789$ ; Upper  
415 blade:  $p=0.0002$ , Kruskal-Wallis test with Dunn's multiple comparisons: Y vs AU:  $p>0.9999$ ; Y vs AI:  
416  $p=0.0003$ ; AU vs AI:  $p=0.0050$ ; Lower blade:  $p=0.6309$ , Kruskal-Wallis test with Dunn's multiple  
417 comparisons: Y vs AU:  $p>0.9999$ ; Y vs AI:  $p>0.9999$ ; AU vs AI:  $p>0.9999$ ). F) Percentage of HA-GFP<sup>+</sup>  
418 neurons (Total DG:  $p=0.0275$ , Kruskal-Wallis test with Dunn's multiple comparisons: Y vs AU:  
419  $p=0.0395$ ; Y vs AI:  $p=0.1667$ ; AU vs AI:  $p>0.9999$ ; Upper blade:  $p=0.0123$ , Kruskal-Wallis test with  
420 Dunn's multiple comparisons: Y vs AU:  $p=0.0160$ ; Y vs AI:  $p=0.1255$ ; AU vs AI:  $p>0.9999$ ; Lower  
421 blade:  $p=0.0842$ , Kruskal-Wallis test with Dunn's multiple comparisons: Y vs AU:  $p=0.1364$ ; Y vs AI:  
422  $p=0.2767$ ; AU vs AI:  $p>0.9999$ ). G) Percentage of Fos<sup>+</sup> neurons (Total DG:  $p=0.1560$ , Kruskal-Wallis  
423 test with Dunn's multiple comparisons: Y vs AU:  $p=0.4933$ ; Y vs AI:  $p=0.2275$ ; AU vs AI:  $p>0.9999$ ;  
424 Upper blade:  $p=0.1724$ , Kruskal-Wallis test with Dunn's multiple comparisons: Y vs AU:  $p=0.4823$ ; Y  
425 vs AI:  $p=0.2690$ ; AU vs AI:  $p>0.9999$ ; Lower blade:  $F(2,27)=3.460$ ,  $p=0.0459$ , one-way ANOVA with  
426 Tukey's multiple comparisons: Y vs AU:  $p=0.0665$ ; Y vs AI:  $p=0.1263$ ; AU vs AI:  $p=0.9298$ ). H)  
427 Spearman correlation between the normalized neuronal ensemble reactivation in the upper blade of  
428 the DG and memory performance of aged mice at long-term object-location test ( $p<0.0001$ ,  $r=0.8396$ ,  
429  $n=17$ , Spearman correlation). I) Spearman correlation between the normalized similarity index in the  
430 upper blade of the DG and memory performance of aged mice at long-term object-location test  
431 ( $p<0.0001$ ,  $r=0.8236$ ,  $n=17$ , Spearman correlation). In all graphs: Y ( $n=13$ ), AI ( $n=9$ ), AU ( $n=8$ ),  
432 \* $p<0.05$ ; \*\* $p<0.01$ ; \*\*\* $p<0.001$ ; # $p<0.05$ ; ## $p<0.01$ ; ### $p<0.001$ ; ns: not significant. DG: Dentate gyrus of  
433 the hippocampus, Dox: doxycycline, AU: aged-unimpaired, AI: aged-impaired, rAAV: recombinant  
434 adeno-associated viruses, pRAM: robust activity marking promoter. Error bars represent s.e.m.  
435



**Figure 1****A**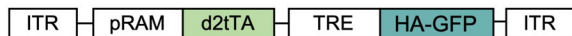

*Stereotaxic delivery of rAAVs into the DG*

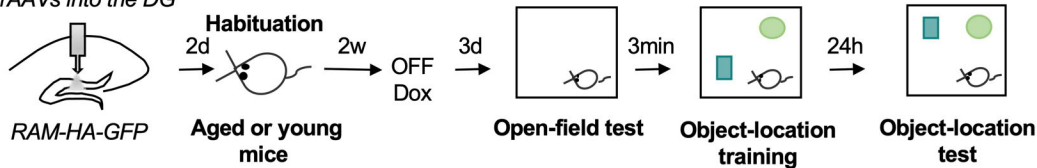**B**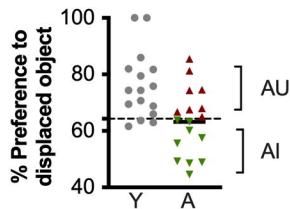**C** **D**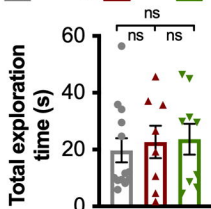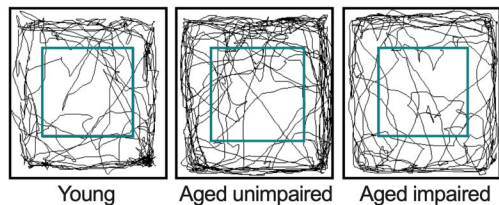**E**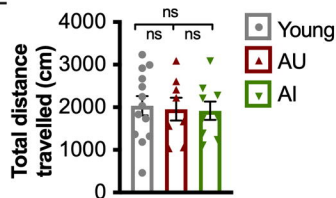**F**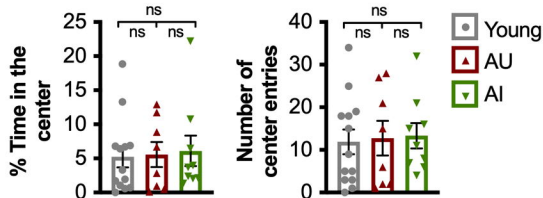

**Figure 2****A**

Stereotaxic delivery  
of rAAVs into the DG

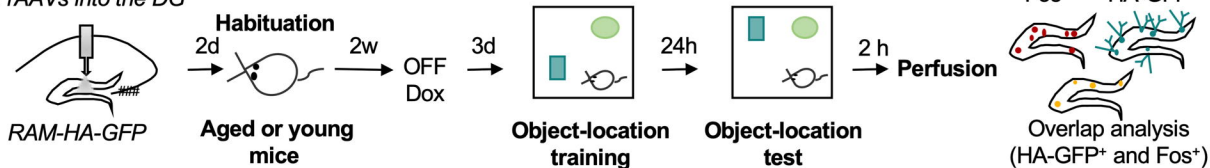**B**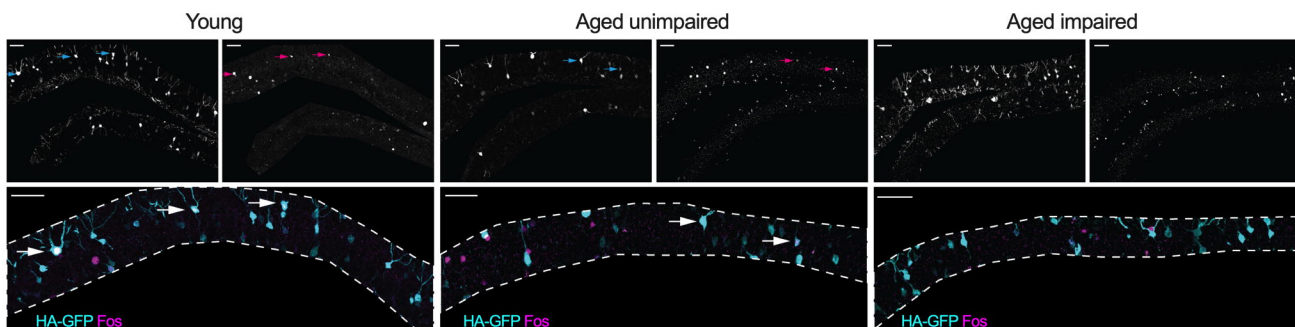**C**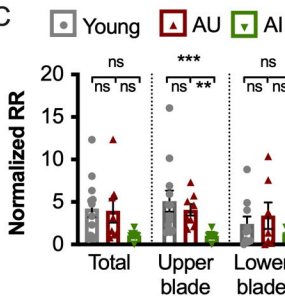**D**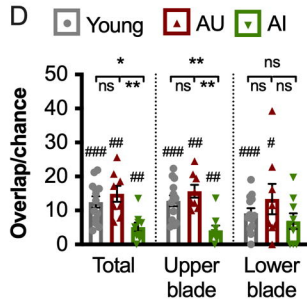**E**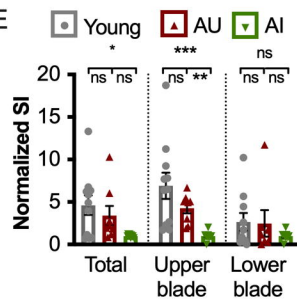**F**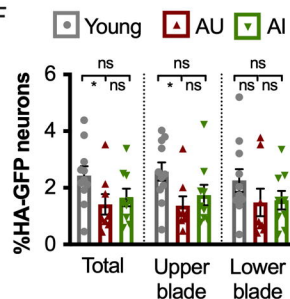**G**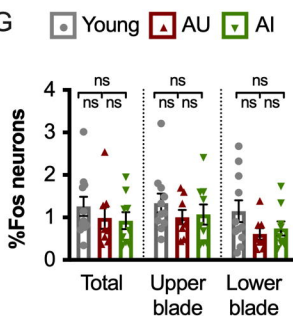**H**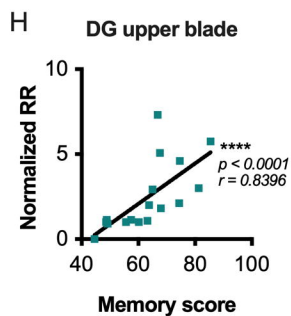**I**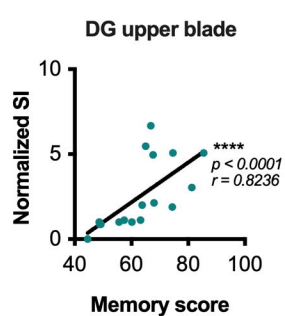

Source: http://biorxiv.org/content/10.1101/2020.01.12.903088v2.full.pdf
